# Supplementary material
Source: Research Square preprint supplement (doi:10.21203/rs.3.rs-10132847/v1)
Supplement: Supplementary file 1 [file 569dab126c3337b4fbf790c6.docx]

# APPENDICES

## Consent

Greetings, my name is ---------------------------------

We are conducting a research thesis on multicenter observational prospective study on prevalence and factors associated with complications in post anesthesia care unit. You was asked few questions about your health and it will take around 10 minutes.

We have got formal permission from institutional review board to conduct the study. You are selected to participate in this study. There was no direct benefit by participating in this study, but in the future information gathered by this study will helps policy makers, programmers and researchers to give appropriate attention on issues of interest and design specific treatment options.

The information was kept confidential by using only code numbers and locking the data. Only the members of the study team will have the access to the non-coded data and the data will not be used for purposes other than the study. Your willingness and active participation is very important for the success of this study. If you need any further information or explanation regarding to the study, you can have this address to contact.

Name: Dr. Ataklti Adhanom Tel- +251-925454110 Email- atakltiadhanom12@.com

Would you be willing to participate? [put’’x’’mark]

1. Yes…………
2. No……………

| Questionnaire | | | | | |
| --- | --- | --- | --- | --- | --- |
| 1 | Center | - Mekelle university - Haramaya - Jimma University | |  |  |
|  | Age |  | |  |  |
| 2 | Gender | - Male - Female | |  |  |
| 3 | ASA | - I, - II - III - IV Male - Female | |  |  |
| 4 | Type of surgery | - Maxillofacial - Cardiothoracic - Neurosurgery - General Surgery - Urology | - Ob/Gyn - ENT - Orthopedics - Pediatric - Plastic | |  |
| 5 | Position of surgery | - sitting - Supine - Lithotomy - Prone - Lateral | |  |  |
| 6 | Urgency of Surgery | - Elective - Emergency | |  |  |
| 7 | Duration of surgery | ______ Hours______Minutes | |  |  |
| 8 | Type of anesthesia | - GA - MAC(Moderate/Deep sedation - Regional (spinal, epidural, nerve block) - GA/RA combined | |  |  |
| 9 | Attending anesthesia professional | - Anesthetist - Resident - Specialist - Anesthetist and specialist | |  |  |
| 10 | Intraoperative blood loss that requerid blood transfusions | - Yes - No | |  |  |
| 11 | Respiratory complication | - Non - Hypoxia</= 92 - Airway obstruction - Respiratory distress | |  |  |
| 12 | GIT complications | - No - Nausea/Vomiting | |  |  |
| 13 | Cardiovascular complications | - Non - Hypertension (20% change of preoperative Value) - Hypotension (20% change of preoperative Value) - Cardio-respiratory arrest - Tachycardia (heartrate >/= 100 beats/min) - Bradycardia (heartrate </= 60 beats/min) | |  |  |
| 14 | Neurological | - Seizure   - - Pain, 0 representing no pain and 10 pain of the greatest intensity. | |  |  |
| 15 | Temperature dysregulation | - No - Hypothermia <35.5 degree Centigrade - Hyperthermia >38.5 degree centigrade | |  |  |
| 16 | Preexisting Comorbidities | - No - Respiratory (B. Asthma, COPD, URTI) - CVS (HTN, CHF, IHD) - Neurological (Epilepsy, Stroke) - Renal/Endocrine (CRF, DM) | |  |  |
| 17 | Outcome | - Transfer to icu - Transfer to ward - Discharged home - Dead | |  |  |
| 18 | Duration of stay in PACU | ______ Hours______Minutes | |  |  |
